# American Neuropsychiatric Association

The American Neuropsychiatric Association (ANPA), established in 1988, is an organization of professionals in neuropsychiatry, behavioral neurology, neuropsychology and the clinical neurosciences. Our mission is to improve the lives of people with disorders at the interface of psychiatry and neurology.

The strength of the organization is our diversity of membership, which is comprised of professionals all areas of neuroscience who share clinical and/or academic interests in neuropsychiatry. The interdisciplinary nature of the membership encourages collaboration among educators, clinicians, researchers, students and trainees in research presentations, symposia, workshops and/or continuing education courses. *The Journal of Neuropsychiatry and Clinical Neurosciences (JNCN)* is the official publication of the organization, and is a benefit of membership.

ANPA holds an annual scientific meeting and provides up to 30 CME/CE credits. Members are encouraged to submit their work for presentation at these annual meetings. Travel awards are available for promising young investigators. Annual meeting abstracts and proceedings are published in *JNCN*.

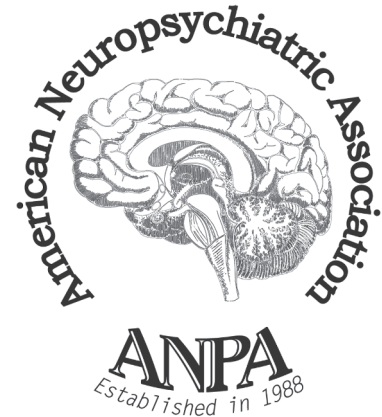

## Contact Information

Website:  
[www.anpaonline.org](http://www.anpaonline.org)

Email:  
[anpa@osu.edu](mailto:anpa@osu.edu)

Phone:  
614-447-2077

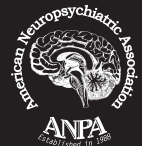

## Join ANPA Now!

**Don't miss ANPA's 23<sup>rd</sup>  
Annual Meeting**

**Sheraton New Orleans Hotel  
New Orleans, Louisiana**

*March 21-24, 2012*

## Benefits of Membership

- Subscription to *The Journal of Neuropsychiatry and Clinical Neurosciences (JNCN)*
- 10% discount for books and journals published by the American Psychiatric Press, Inc
- 20% discount on DSM Select at PsychiatryOnline.com
- Opportunity for presentation at the annual meeting with accepted abstracts published in the *JNCN*
- Significantly reduced registration fees at the annual meeting
- Newsletters, news updates, information on job and training opportunities, research and meeting information on the ANPA web site: [www.anpaonline.org](http://www.anpaonline.org)
- Discounted membership and meeting registration fees for trainees
- Collaboration in clinical, educational and research activities and the opportunity to interact with senior colleagues
- Opportunity to participate on committees and in the future leadership of ANPA
- Opportunity to participate in on-line forums for discussion of research, clinical cases and/or current issues related to neuropsychiatric practice
- Opportunity to join Special Interest Groups for members who have common interests in specific research, clinical cases, practice issues or educational areas

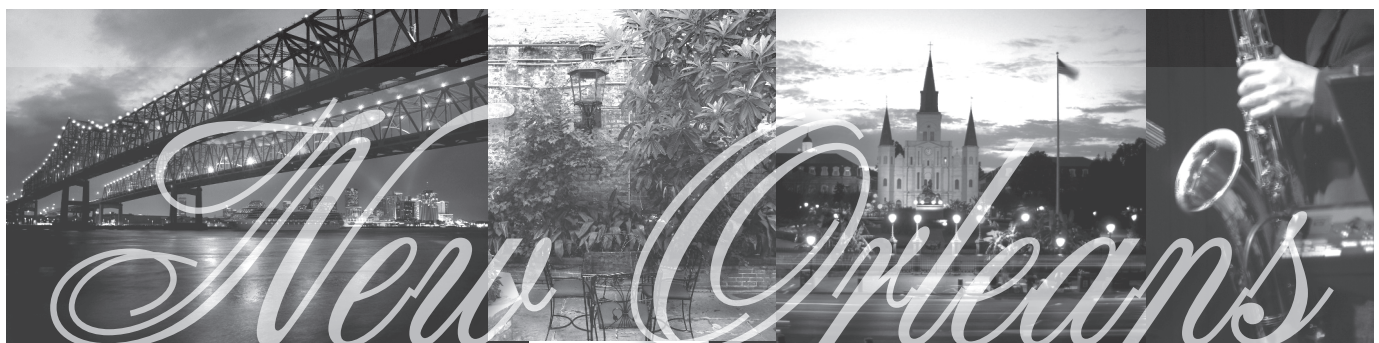

Join online at: [www.anpaonline.org](http://www.anpaonline.org)

23<sup>rd</sup> Annual Meeting

# American Neuropsychiatric Association

[www.anpaonline.org](http://www.anpaonline.org)

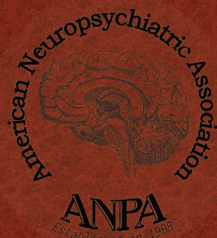

## Meeting Announcement & call for abstracts

2012 Annual Meeting Theme: **Mood, Memory & Movement**

### *You are invited*

to submit abstracts reporting new research or challenging clinical cases for poster and platform presentations.

Abstracts presented at the meeting will be published on-line in the spring 2012 issue of the *Journal of Neuropsychiatry and Clinical Neurosciences*.

Several types of awards are made in conjunction with abstracts accepted for presentation at the 23rd Annual Meeting of the American Neuropsychiatric Association.

Prior to submitting abstracts, please refer to our website for more information about these awards.

**Deadline for receipt of abstracts is October 25, 2011**

Find complete submission instructions at: [www.anpaonline.org](http://www.anpaonline.org)

**Continuing Education Credits will be offered**

### Meeting Highlights

#### *Areas of Emphasis*

Neurology of Depression  
Alzheimer's Disease and Related Conditions  
Neuropsychiatric Aspects of Parkinson's Disease  
Insula, Interoception, and Affectivity  
Schizophrenia and Aggression  
Education in Behavioral Neurology & Neuropsychiatry  
Neuropsychiatric Research and Practice

#### *Featuring*

Jeffrey L. Cummings, M.D.  
Helen S. Mayberg, M.D.  
Sheldon Benjamin, M.D.  
Daniel R. Wilson, M.D., Ph.D.  
Laura Marsh, M.D.

Tiffany W. Chow, M.D.  
Jeffrey Victoroff, M.D.  
Daniel I. Kaufer, M.D.  
Robin A. Hurley, M.D.

Meeting information can be found on the ANPA web site:

[www.anpaonline.org](http://www.anpaonline.org)

# New Orleans

Sheraton New Orleans Hotel • 500 Canal Street • New Orleans, LA 70130

## March 21-24, 2012

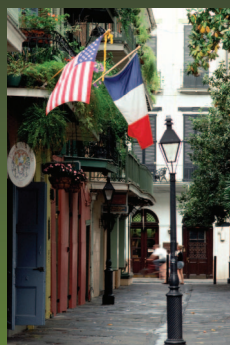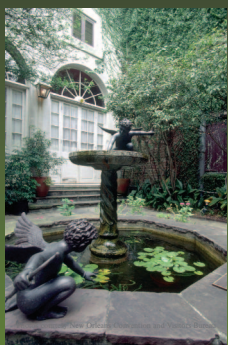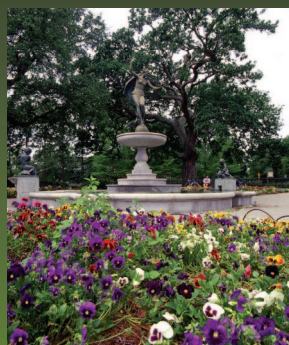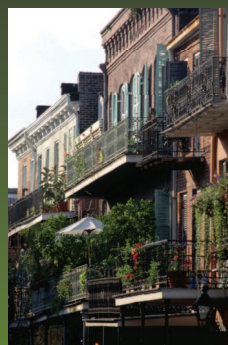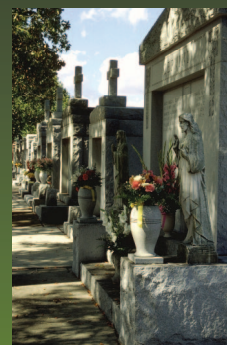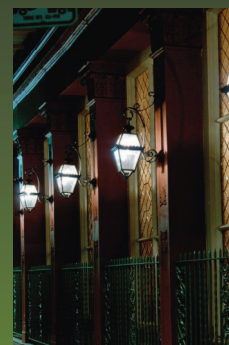

For more information contact the American Neuropsychiatric Association office:

700 Ackerman Road, Suite 625 • Columbus, Ohio USA 43202 • Phone: 614-447-2077 • E-mail: [anpa@osu.edu](mailto:anpa@osu.edu) • [www.anpaonline.org](http://www.anpaonline.org)
